# Supplementary material for: The regulatory effects of phytosterol esters (PSEs) on gut flora and faecal metabolites in rats with NAFLD
Source: Royal Society of Chemistry journal article supplement (doi:10.1039/c9fo01570a), 2019-11-14
Supplement: c9fo01570a1.pdf [file c9fo01570a1.pdf]

Table S1 Primer sequence of genes

| Gene           | Primer (Forward)     | Primer (Reverse)     |
|----------------|----------------------|----------------------|
| Occludin       | CCATGTCTGTGAGGCCTTTT | AAAGAGTATGCCGGCTGAGA |
| Claudin-1      | ATTGGCATGAAGTGCATGAG | CCACTAATGTCGCCAGACCT |
| $\beta$ -actin | AGAGGGAAATCGTGCGTGA  | CGATAGTGATGACCTGACCG |
|                | C                    | T                    |
